# Supplementary material
Source: PubMed Central journal article supplement (PMC4362711)
Supplement: NIHMS661729-supplement-Supp__File_1.pdf [file NIHMS661729-supplement-Supp__File_1.pdf]

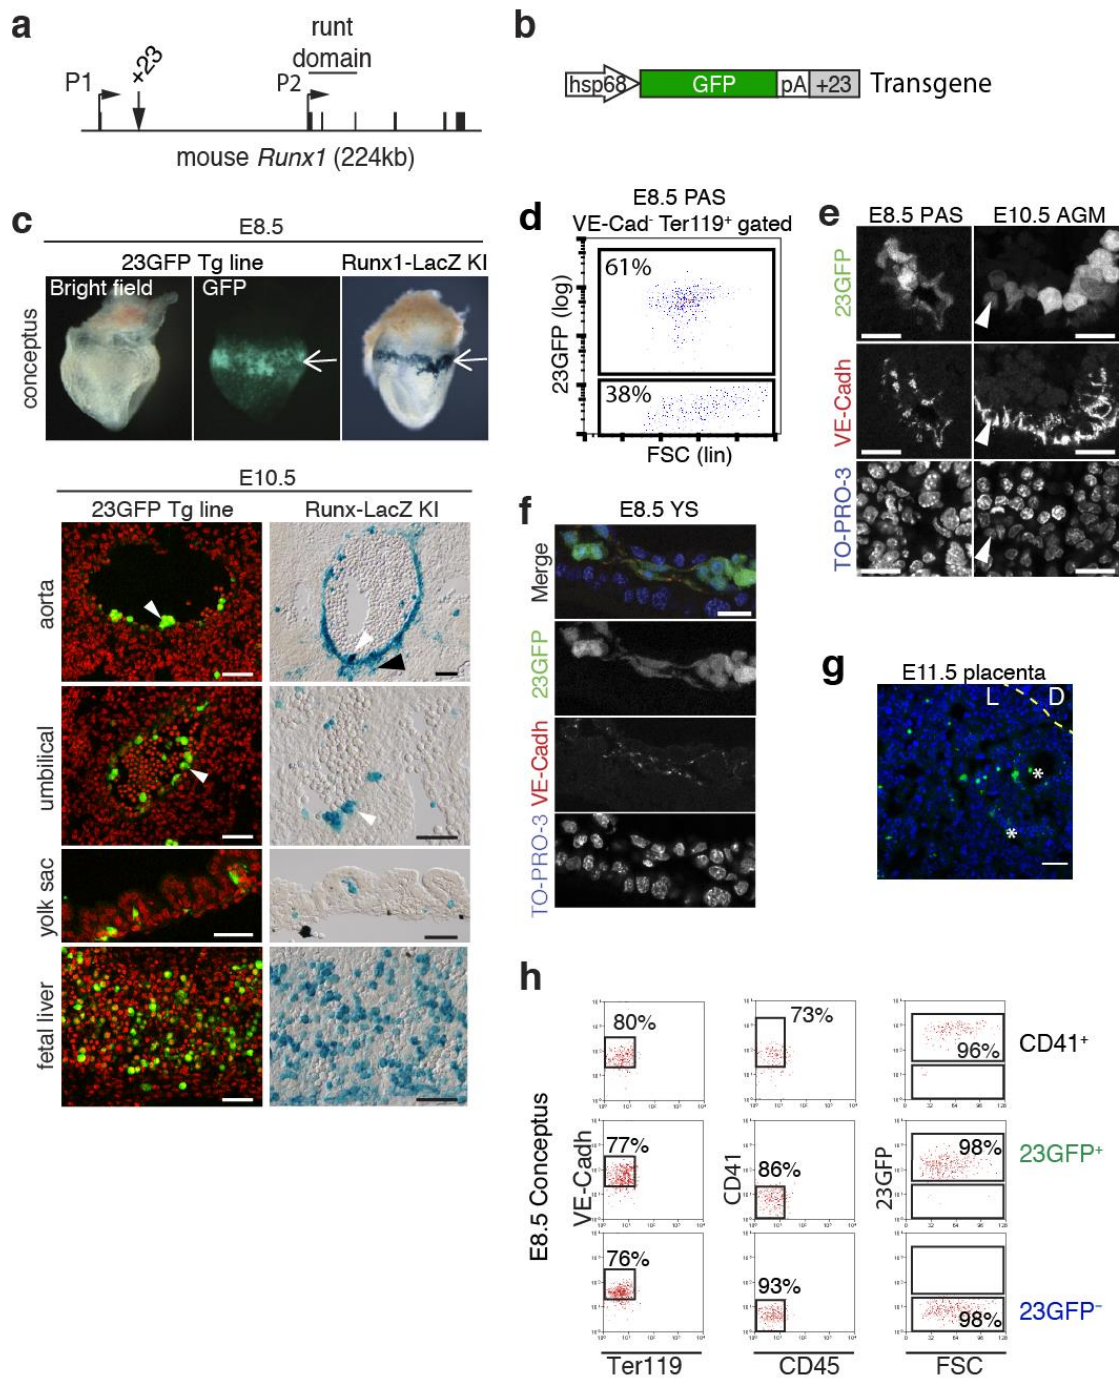

**Supplementary Figure S1.** Characterisation of the 23GFP reporter line. (a) Schematic of mouse *Runx1* locus with the distal P1 and proximal P2 promoters and location of the +23 enhancer highlighted. (b) Schematic of the 23GFP reporter construct. pA = SV40 polyadenylation site. (c) Comparison of the 23GFP reporter expression with Runx1-lacZ knockin mice, showing expression in

hematopoietic territories as described in Nottingham et al.<sup>22</sup>. At E8.5 23GFP expression is detected in the yolk sac blood island (arrow) in a pattern similar to that of the Runx1-LacZ KI. At E10.5 23GFP expression is expressed in hematopoietic sites only, in a pattern similar to the Runx1-LacZ KI mice (white arrowhead, example of hematopoietic cell). The 23GFP enhancers specificity for the hematopoietic lineage is also seen from the absence of widespread 23GFP expression in the subaortic mesenchyme (black arrowhead, marked in the Runx1-LacZ KI), which are mostly smooth muscle cells<sup>56</sup>. Scale bar = 50  $\mu$ m (d) Flow cytometric analysis of E8.5 PAS region for Ter119, a marker of primitive erythrocytes. (e) Single channel images for the images shown in Fig. 1a: 23GFP (top), VE-Cadh (middle) and nuclear (TO-PRO-3; bottom) expression at E8.5 and E10.5. Arrowhead: example of 23GFP expression in VE-Cadh<sup>+</sup> endothelial cells, scale bar = 20  $\mu$ m. (f) 23GFP expression is also detected in endothelial (and haematopoietic) cells of the E8.5 YS. Representative image of VE-Cadh immunostaining (red) on a 10  $\mu$ m section through 23GFP transgenic (green) yolk sac. Nuclear TO-PRO-3 in blue, scale bar = 20  $\mu$ m. (g) 23 GFP expression is detected in the placenta. L = labyrinth, D = decidua. Asterisk = vessel. Scale bar = 50  $\mu$ m. (h) Representative sort re-analysis (with sort gates shown) for E8.5 conceptus. Percentages reveal the proportion of events within the sort gate when re-analysed.

**a**

**E8.5 PAS+VU sort gates and post-sort analysis**

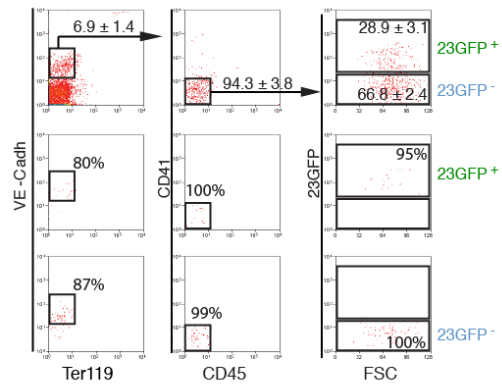

**b**

**E9.25 PAS+VU sort gates and post-sort analysis**

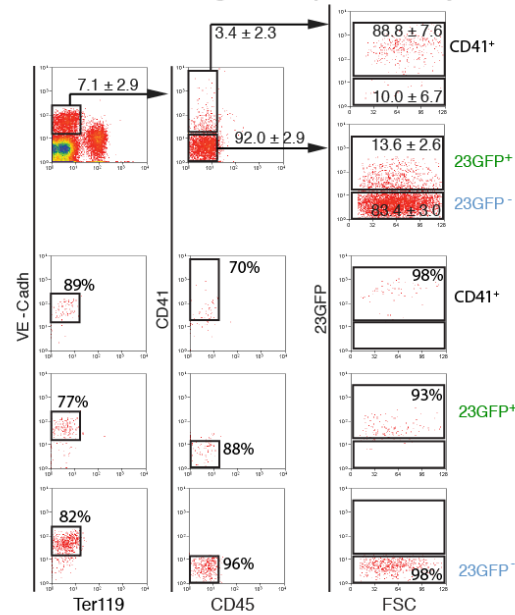

**c**

**E10.5 AGM + VU sort gates and post-sort analysis**

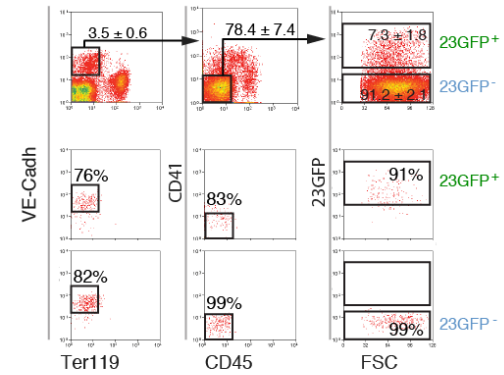

**d**

| Cell population plated on OP9 | Cells / well | Wells with haematop. progeny / Total wells |       |
|-------------------------------|--------------|--------------------------------------------|-------|
|                               |              | E8.5                                       | E10.5 |
| 23GFP <sup>-</sup> EC         | 1000         | 0/10                                       | 0/7   |
| 23GFP <sup>+</sup> EC         | 1000         | 7/9                                        | 4/4   |
| CD41 <sup>+</sup> HPC         | 500          | 4/4                                        | 2/2   |

**e**

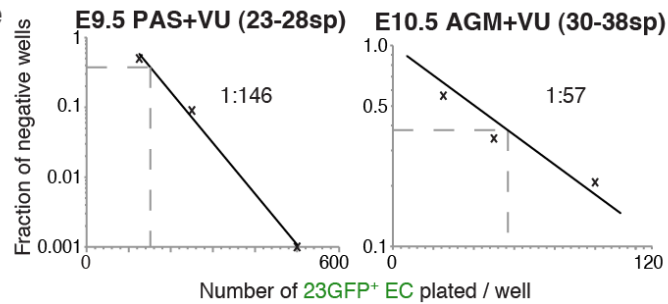

**f**

| Cell population plated on OP9 (E10.5 YS) | Cells / well | Wells with haematop. progeny / total wells |
|------------------------------------------|--------------|--------------------------------------------|
| 23GFP <sup>-</sup> EC                    | 3000         | 0/3                                        |
| 23GFP <sup>+</sup> EC                    | 2800         | 2/2                                        |

**g**

| Stage            | CFU-C frequency in 23GFP <sup>+</sup> EC |
|------------------|------------------------------------------|
| E8.5 (4-10 sp)   | 1:3156                                   |
| E10.5 (32-37 sp) | 1:183                                    |

**Supplementary Figure S2.** Representative sort gates and reanalysis for (a) E8.5 PAS+VU, (b) E9.25 PAS+VU, (c) and E10.5 AGM+VU. Numbers within the sort gates are indicated and are the mean percentage  $\pm$  SD of at least 3 independent experiments. Representative re-analysis percentages as shown. (d) Summary of haemogenic OP9 co-cultures at E8.5 and E10.5. At least 3 independent sorts were performed on pooled tissues dissected from staged embryos (except for E10.5 VE-Cadh<sup>+</sup>Ter119<sup>-</sup>CD45<sup>-</sup>CD41<sup>+</sup> HPCs where n=2). (e) Limiting dilution analysis of haemogenic output of 23GFP in OP9 co-cultures; data are the mean of 2 (E9.5) and 3 (E10.5) independent experiments. (f) Summary of haemogenic progeny generated during OP9 cultures of E10.5 (34-38sp) YS ECs. Data are from one independent experiment. (g) Frequency of CFU-C formation from 23GFP expressing ECs (VE-Cadh<sup>+</sup>Ter119<sup>-</sup>CD45<sup>-</sup>CD41<sup>-</sup>). Data are from at least 3 independent sorts performed on pooled tissues dissected from stage-matched embryos.

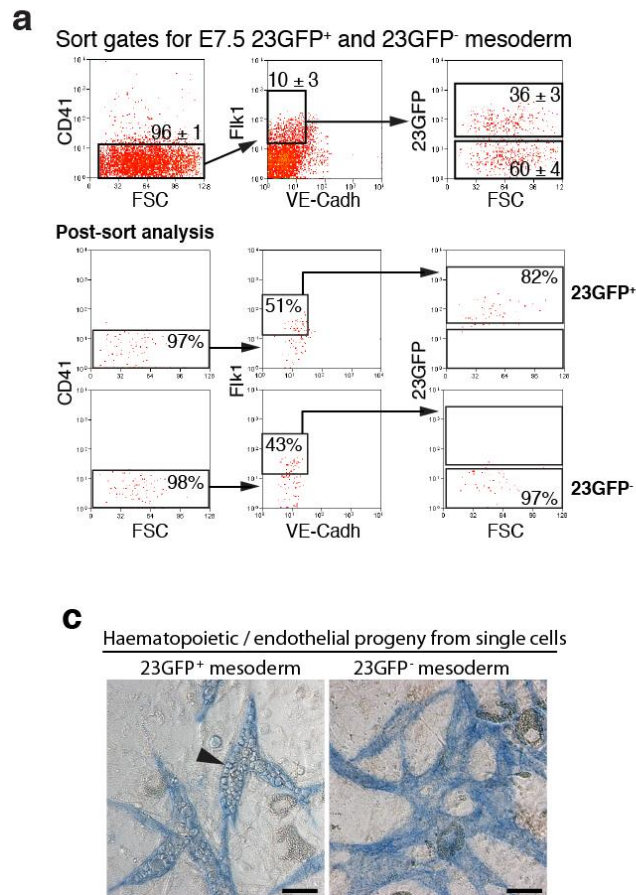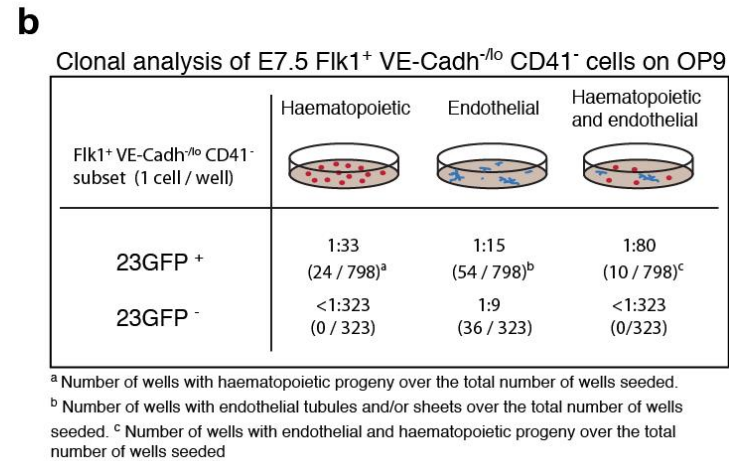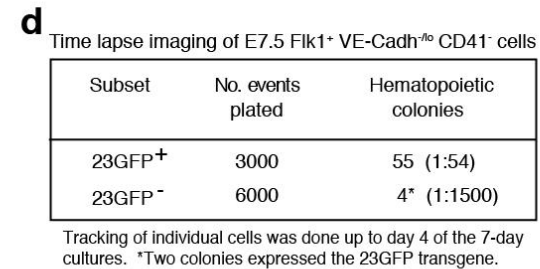

**Supplementary Figure S3.** Haematopoietic and endothelial progeny can be generated from single E7.5 Flk1<sup>+</sup>VE-Cadh<sup>-/lo</sup>CD41<sup>-</sup> 23GFP<sup>+</sup> mesodermal cells. (a) Representative sort plots and re-analysis for E7.5 mesoderm. Numbers indicate the average percentage ± SD of

events within the sort gates from 7 independent experiments. Representative post-sort reanalysis percentages are shown. (b) Frequency of cells with haematopoietic, endothelial and combined haematopoietic and endothelial potential in cultured 23GFP<sup>+</sup> and 23GFP<sup>-</sup> Flk1<sup>+</sup>VE-Cadh<sup>-/lo</sup>CD41<sup>-</sup> mesoderm populations after 4 days co-culture on OP9 stroma. Shown are the frequencies of, and number of wells positive for haematopoietic and/or endothelial cells over the total number of wells analyzed. Data are compiled from 2 independent experiments. (c) Representative images of endothelial networks stained by CD31 expression (blue). Scale bar = 50 μm. Arrowhead indicate representative semi-adherent haematopoietic cells. (d) Summary of timelapse imaging of E7.5 cells on OP9 stroma. Cells were recorded for 7 days, and tracked using Timms Tracking Tool for 4 days. The frequency of cells giving rise to haemogenic 23GFP<sup>+</sup> colonies is shown. Two of the 23GFP<sup>-</sup> sorted cells that gave rise to haematopoietic colonies were GFP<sup>+</sup> at the start of the movie.

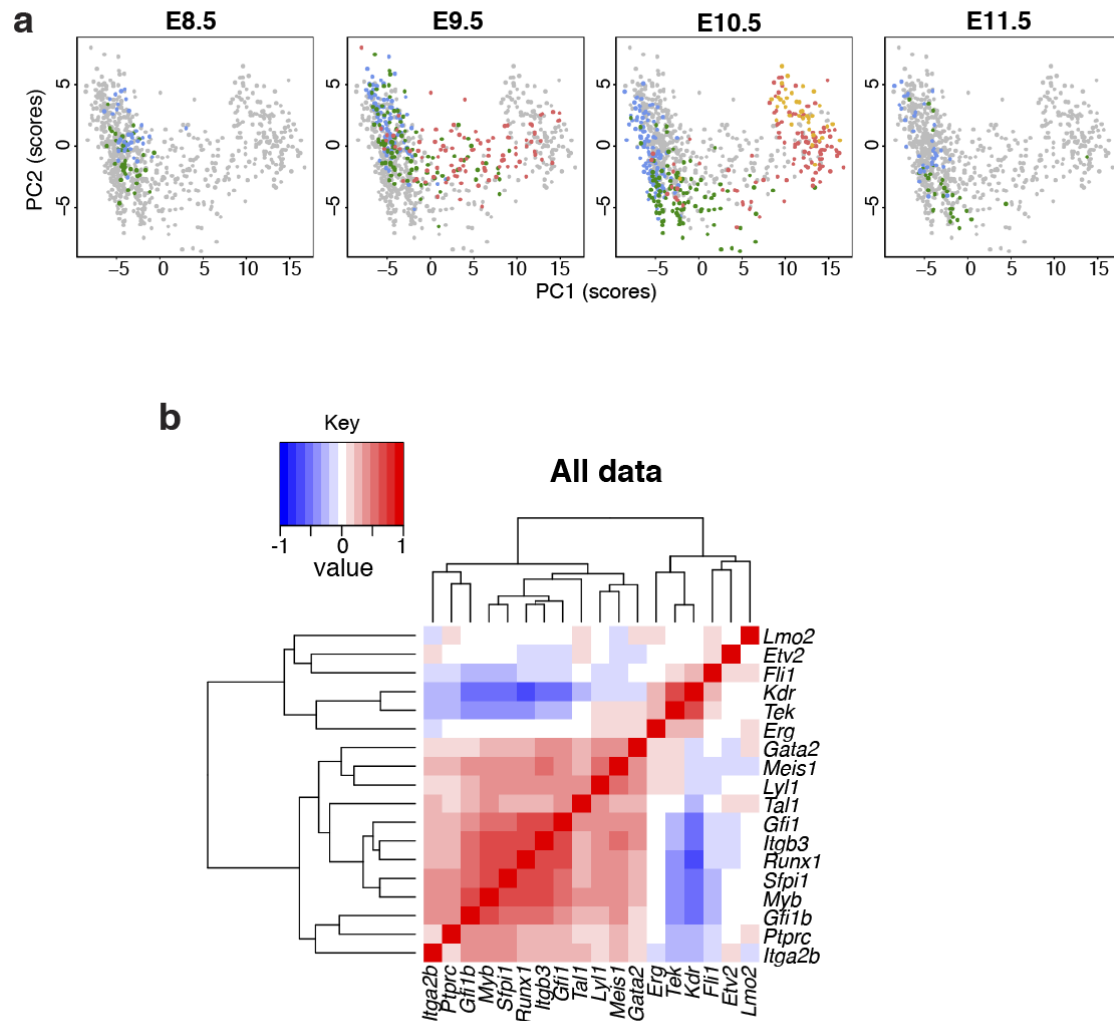

**Supplementary Figure S4.** (a) Principal component projections of 77 E8.5 (5-9sp; n=1), 301 E9.5 (23-28sp; n=2), 356 E10.5 (31-36sp; n=3 except CD45<sup>+</sup> haematopoietic cells n=1) and 69 E11.5 (n=1) single cells. Data from the other developmental stages are greyed out for clarity. (b) Pair-wise Pearson correlations were calculated between all genes for all cells at all time points. Positive correlations (red) occur when genes are co-expressed (or not expressed) in individual cells whereas negative correlations (blue) result from the expression of one gene and the absence/reduced expression of the other gene in the same cell.



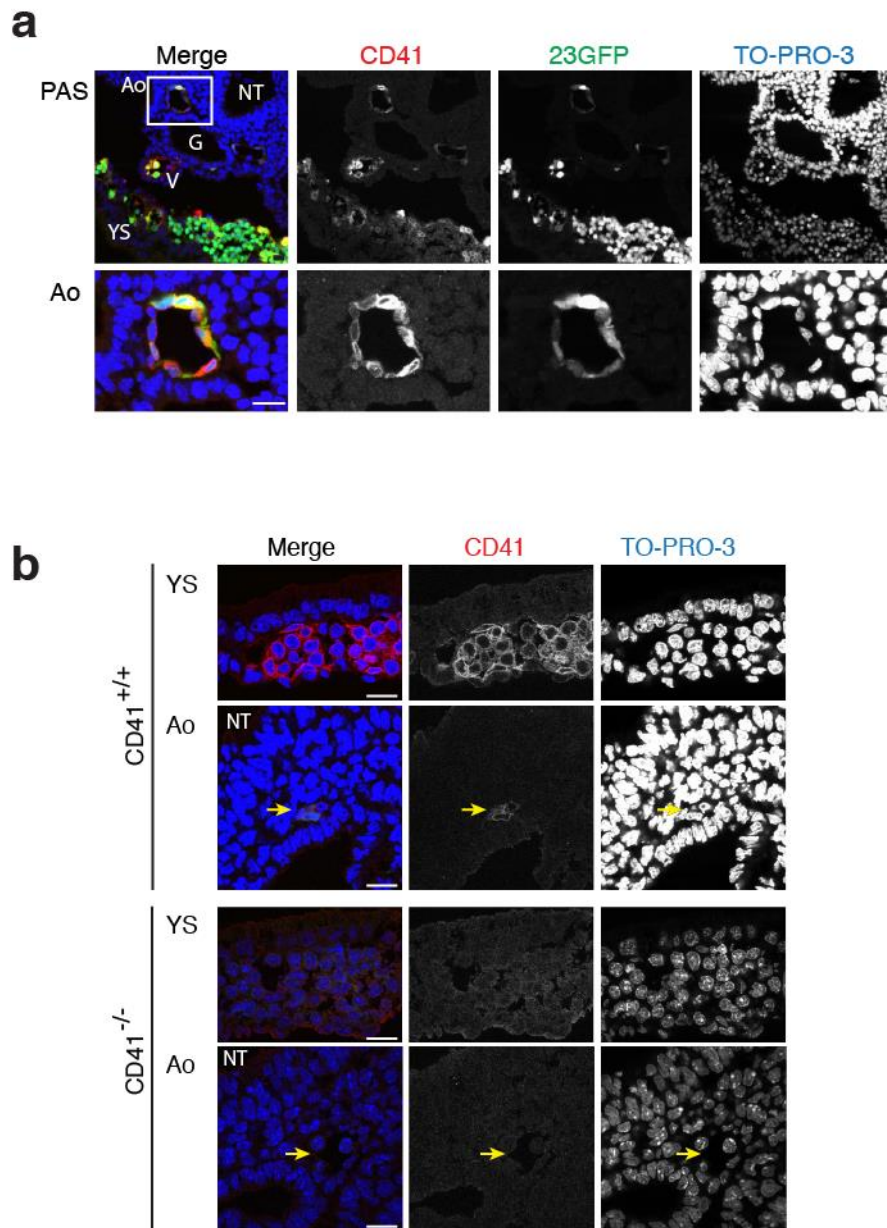

**Supplementary Figure S5.** (a) CD41 immunostaining (red) and +23GFP (green) expression on 10  $\mu\text{m}$  cryosections through the posterior region of an E8.5 (12 sp) +23GFP transgenic embryo. Individual channels and merged image are shown. Boxed region is shown at higher magnification in lower panels. V = vitelline, Ao = dorsal aorta, YS = yolk sac, G = gut, NT = neural tube. Nuclear stain in blue, scale bar = 20  $\mu\text{m}$ . (b) CD41 immunostaining (red) and nuclear stain (blue) on 10  $\mu\text{m}$  sections of the YS and posterior region of the dorsal aorta of E8 (4sp)  $\text{CD41}^{+/+}$  and  $\text{CD41}^{-/-}$  embryos<sup>57</sup>. No CD41 expression can be detected in  $\text{CD41}^{-/-}$  embryos (arrow); stage-matched wildtype embryos clearly show CD41



expression in the YS and dorsal aorta (arrow). NT = neural tube, nuclear stain in blue, scale bar = 20  $\mu\text{m}$ .

## Supplementary Tables

**Supplementary Table S1.** Antibodies and Conjugates used in this study

| Antibody                   | Fluorochrome    | Clone         | Supplier          | Catalogue number | Dilution |
|----------------------------|-----------------|---------------|-------------------|------------------|----------|
| CD31                       | purified        | MEC13.3       | BD Pharmingen     | 553370           | 1:1000   |
| Goat anti rabbit IgG (H+L) | Alexa Fluor 555 |               | Life Technologies | A21428           | 1:200    |
| Goat anti rat IgG (H+L)    | Alexa Fluor 555 |               | Life Technologies | A21434           | 1:200    |
| Goat anti Rat IgG AP       |                 |               | Southern biotech  | 3050-04          | 1:250    |
| Runx1                      |                 |               | gift Jessel lab   |                  | 1:1600   |
| ToPro-3                    |                 |               | Life Technologies | T3605            | 1:5000   |
| CD41                       | purified        | MWReg30       | BD Pharmingen     | 553847           | 1:40     |
| VE-Cadherin                | purified        | 11D4.1        | BD Pharmingen     | 555289           | 1:40     |
| CD19                       | APC             | 1B3           | BD Pharmingen     | 550992           | 1:100    |
| CD41                       | PE              | MWReg30       | BD Pharmingen     | 558040           | 1:100    |
| CD45                       | APCCy7          | 30-F11        | BD Pharmingen     | 557659           | 1:100    |
|                            | APCeFluor780    |               | ebioscience       | 47-0451          | 1:100    |
|                            | APC             |               | BD Pharmingen     | 559864           | 1:100    |
|                            | PE              |               | BD Pharmingen     | 553081           | 1:100    |
| Flk1                       | APC             | Avas 12alpha1 | BD Pharmingen     | 560070           | 1:100    |
| Gr1                        | biotinylated    | RB6-8C5       | BD Pharmingen     | 553125           | 1:400    |
| Hoechst 33258              |                 |               | Life Technologies | H3569            | 1:10,000 |
| Mac1                       | PE              | M1/70         | BD Pharmingen     | 557397           | 1:100    |
| Streptavidin               | PECy7           | SA1012        | Life Technologies | SA1012           | 1:100    |
| Ter119                     | biotinylated    | TER119        | BD Pharmingen     | 553672           | 1:100    |
| VE-Cadherin                | Alexa Fluor 647 | ebioBV13      | ebioscience       | 51-1441          | 1:100    |

**Supplementary Table S2.** Cytokines used in this study

| <b>Cytokine</b> | <b>Working Concentration</b> | <b>Supplier</b> | <b>Catalogue Number</b> |
|-----------------|------------------------------|-----------------|-------------------------|
| Il7             | 50 U/ml                      | Peprotech       | 217-17                  |
| Flt3l           | 10 ng/ml                     | Peprotech       | 250-31L                 |
| SCF             | 10 ng/ml                     | Peprotech       | 250-03                  |
| VEGF            | 50 ng/ml                     | Peprotech       | 450-32                  |

**Supplementary Table S3.** Taqman assays used in the study

| <b>Gene</b> | <b>Gene Name</b> | <b>Assay number</b> | <b>25 cell</b> | <b>Single cell</b> |
|-------------|------------------|---------------------|----------------|--------------------|
| Atp5a1      | <b>Atp5a1</b>    | Mm00431960_m1       | x              | x                  |
| Atp5a1      | <b>Atp5a1</b>    | Mm01257366_m1       |                | x                  |
| ActB        | <b>Bactin</b>    | Mm00607939_s1       | x              |                    |
| Cbfb        | <b>Cbfb</b>      | Mm00491551_m1       |                | x                  |
| VE-Cadherin | <b>Cdh5</b>      | Mm00486938_m1       |                | x                  |
| Erg         | <b>Erg</b>       | Mm01214246_m1       |                | x                  |
| Etsrp71     | <b>Etv2</b>      | Mm00468389_m1       |                | x                  |
| Fli1        | <b>Fli1</b>      | Mm00484409_m1       |                | x                  |
| Gata2       | <b>Gata2</b>     | Mm00492300_m1       | x              | x                  |
| Gata3       | <b>Gata3</b>     | Mm00484683_m1       | x              |                    |
| Gfi1        | <b>Gfi1</b>      | Mm00515855_m1       | x              | x                  |
| Gfi1b       | <b>Gfi1b</b>     | Mm00492318_m1       |                | x                  |
| hHex        | <b>Hex</b>       | Mm00433954_m1       |                |                    |
| Hrpt1       | <b>Hprt1</b>     | Mm00446968_m1       | x              |                    |
|             |                  | Mm01545399_m1       |                | x                  |
| CD41        | <b>Itga2</b>     | Mm00439768_m1       |                | x                  |
| CD61        | <b>Itgb3</b>     | Mm00443980_m1       |                | x                  |
| Flk1        | <b>Kdr</b>       | Mm01222421_m1       |                | x                  |
| Lmo2        | <b>Lmo2</b>      | Mm01281680_m1       |                | x                  |
| Lyl1        | <b>Lyl1</b>      | Mm00493219_m1       |                | x                  |
| Meis1       | <b>Meis1</b>     | Mm00487664_m1       | x              | x                  |
| C-Myb       | <b>Myb</b>       | Mm00501741_m1       | x              | x                  |

## Supplementary References

56. Mirshekar-Syahkal, B. *et al.* Dlk1 is a negative regulator of emerging hematopoietic stem and progenitor cells. *Haematologica* **98**, 163-171 (2013).
57. Emambokus, N.R. & Frampton, J. The glycoprotein IIb molecule is expressed on early murine hematopoietic progenitors and regulates their numbers in sites of hematopoiesis. *Immunity* **19**, 33-45 (2003).
